# Supplementary material
Source: PubMed Central journal article supplement (PMC5971457)
Supplement: supp_RA118.001885_135268_2_supp_89374_p5bvq8.pdf [file supp_RA118.001885_135268_2_supp_89374_p5bvq8.pdf]

**Supplementary Information**

Acute loss of iron–sulfur clusters results in metabolic reprogramming and generation of lipid droplets in mammalian cells

**Daniel R. Crooks<sup>1</sup>, Nunziata Maio<sup>2</sup>, Andrew N. Lane<sup>3</sup>, Michal Jarnik<sup>4</sup>, Richard M. Higashi<sup>3</sup>, Ronald G. Haller<sup>5</sup>, Ye Yang<sup>1</sup>, T. W-M. Fan<sup>3</sup>, W. Marston Linehan<sup>1</sup>, Tracey A. Rouault<sup>2</sup>**

From the <sup>1</sup>Urologic Oncology Branch, Center for Cancer Research, National Cancer Institute, Bethesda, MD 20892; <sup>2</sup>Section on Human Iron Metabolism, *Eunice Kennedy Shriver* National Institute of Child Health and Human Development, Bethesda, MD 20892; <sup>3</sup>Center for Environmental and Systems Biochemistry, Department of Toxicology and Cancer Biology and Markey Cancer Center, University of Kentucky, Lexington, Kentucky 40536, USA; <sup>4</sup>Section on Cell Biology and Metabolism, *Eunice Kennedy Shriver* National Institute of Child Health and Human Development, National Institutes of Health, Bethesda, MD 20892, USA; <sup>5</sup>Department of Neurology, University of Texas Southwestern Medical Center and VA North Texas Medical Center, and Neuromuscular Center, Institute for Exercise and Environmental Medicine, Dallas, Texas 75231

## Metabolic reprogramming in acute Fe-S cluster deficiency

| primer #      | primer name        | sequence                                                     | purpose                                                         |
|---------------|--------------------|--------------------------------------------------------------|-----------------------------------------------------------------|
| <b>DRC001</b> | hISCU forward      | attaagctccaccatggcggcggctgggctt                              | For cloning ISCU2 with HindIII upstream site and kozak sequence |
| <b>DRC003</b> | hISCU reverse      | cgctcagagctacagatcttctcagaataagttttgttcttctctgcctctctttttggg | universal hISCU reverse primer with myc tag and XhoI site       |
| <b>DRC004</b> | emGFP forward      | attaagctt ccaccatggtgagcaagggcaggagctgttc                    | with HindIII site upstream and kozak sequence                   |
| <b>DRC005</b> | emGFP reverse      | cgctcagagctacagatcttctcagaataagttttgttcttctctgcctctctttttggg | with myc tag and XhoI site                                      |
| <b>DRC048</b> | hISCU-D37A forward | ccagcatgtgtgcccgaatgaaatta                                   | site-directed mutagenesis; 5' phosphorylated and HPLC purified. |
| <b>DRC049</b> | hISCU-D37A reverse | agcccccaccagtccagttccaacatt                                  | site-directed mutagenesis; 5' phosphorylated and HPLC purified. |
| <b>DRC053</b> | hISCU-C35S forward | ccagcaagtgtgacgtaataaatta                                    | site-directed mutagenesis; 5' phosphorylated and HPLC purified. |

**Table 1: PCR primer sequences used in this study**

## Metabolic reprogramming in acute Fe-S cluster deficiency

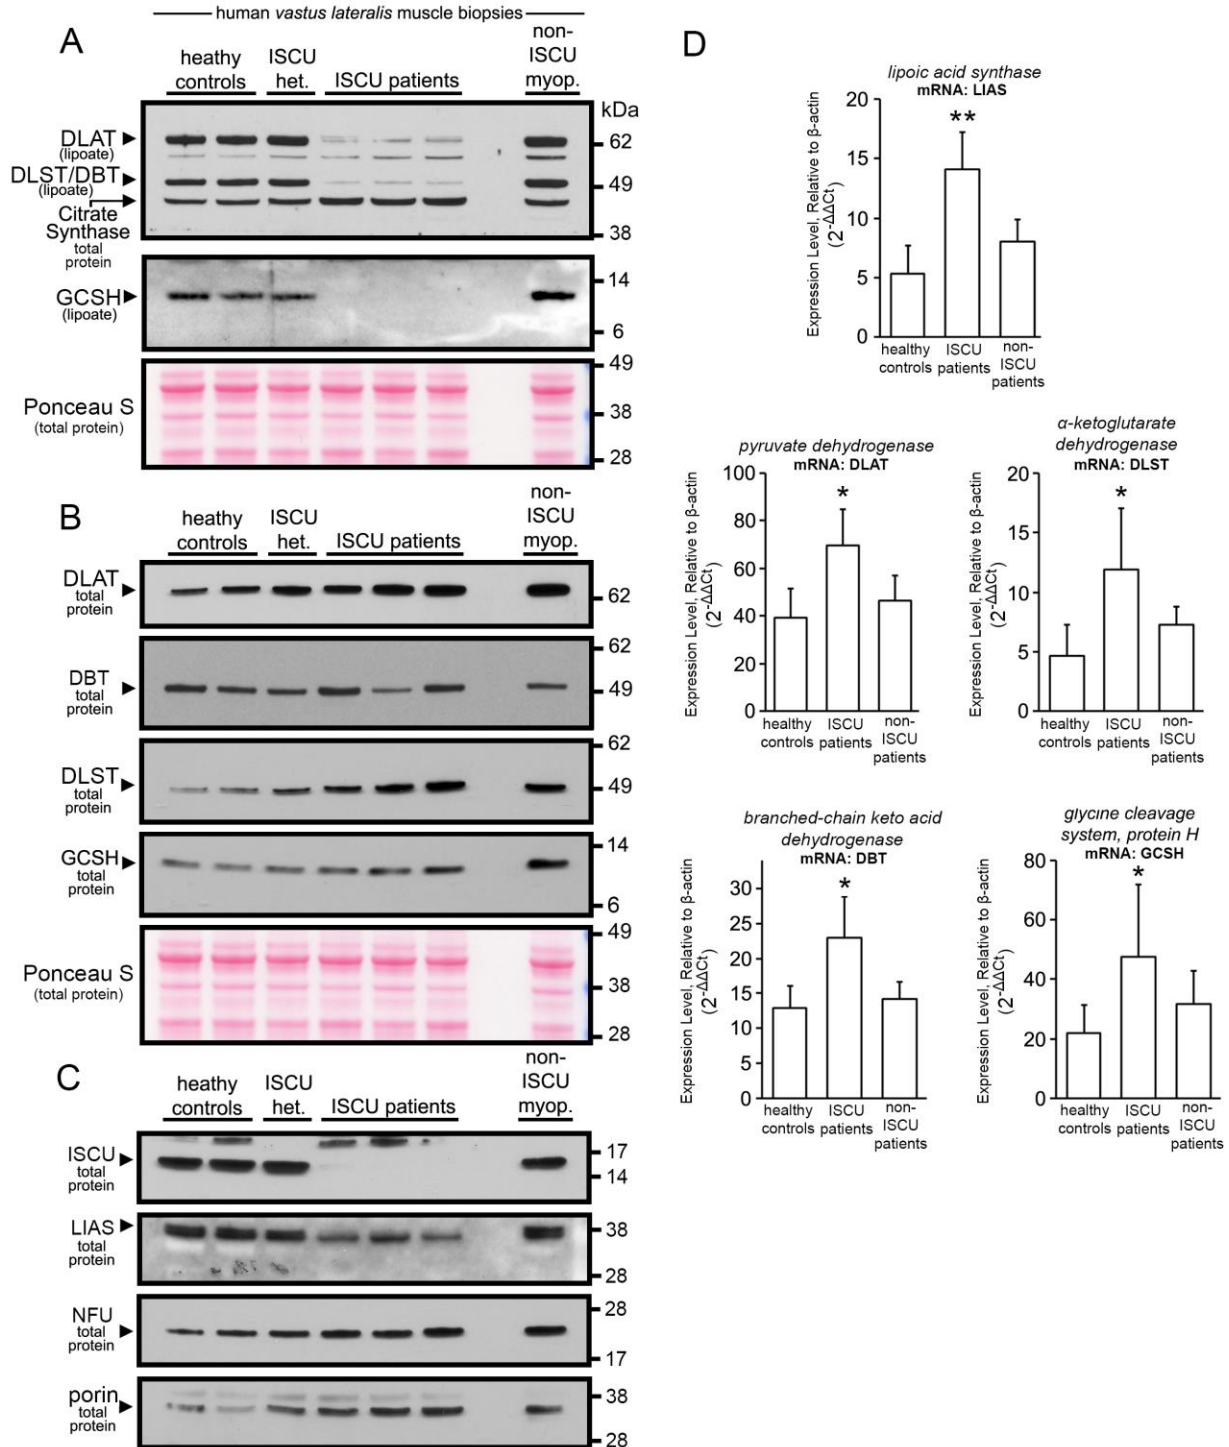

**Figure S1: Defective lipoylation of protein subunits in skeletal muscle biopsies from ISCU myopathy patients.** (A) Protein lipoylation in ISCU myopathy patient muscle biopsies was evaluated by immunoblot using an antibody specific to lipoylated lysine residues. The membrane was re-blotted with an antibody against citrate synthase to evaluate abundance of a non-lipoylated mitochondrial protein. Protein loading was assessed by Ponceau-S staining of total proteins on the membrane. (B) Immunoblots for total protein levels of lipoylate-containing subunits revealed no decrease in subunit protein levels in the

## Metabolic reprogramming in acute Fe-S cluster deficiency

patient samples. (C) Immunoblots confirmed strongly-decreased abundance of ISCU and LIAS protein level in patient muscle biopsies, whereas abundance of NFU and porin proteins was not decreased. Porin/VDAC1 immunoblot served as a loading control for mitochondrial protein. (D) qPCR was used to evaluate mRNA expression of LIAS and the LIAS targets DLAT, DLST, DBT and GCSH. T-tests were used to evaluate statistical differences between either the healthy controls (n=6) vs ISCU myopathy patients (n=3), or between healthy controls and non-ISCU myopathy patients (n=5). Data are mean±SD \*p<0.05, \*\*p<0.01.

## Metabolic reprogramming in acute Fe-S cluster deficiency

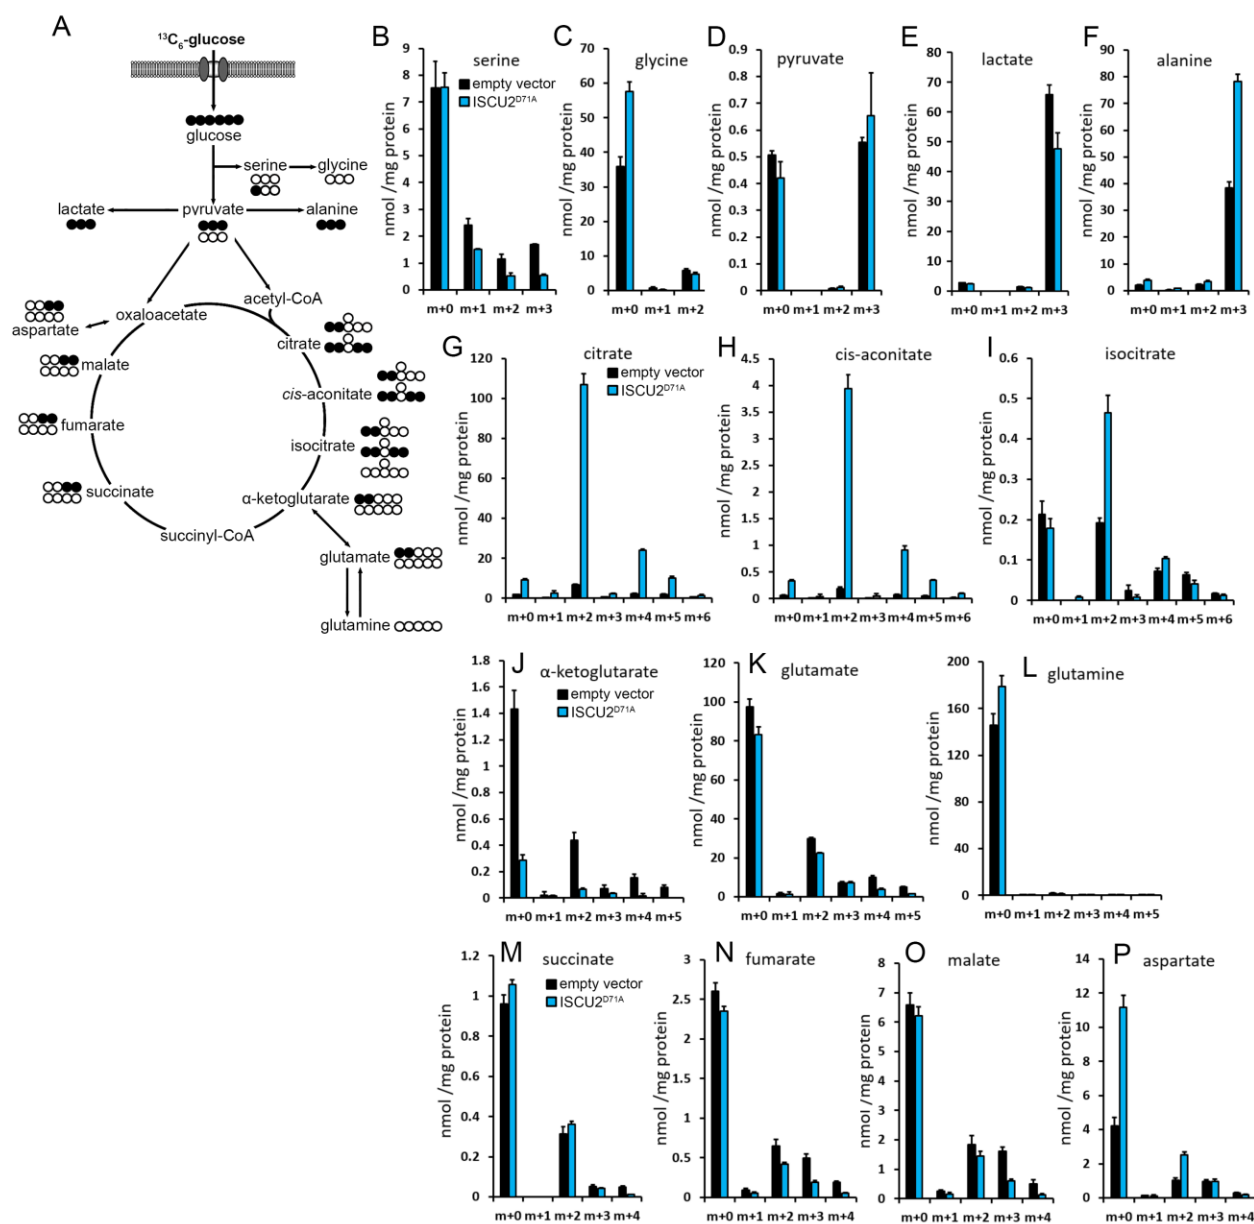

**Figure S2: Fractional isotopologue distribution of selected intracellular metabolites.** (A) Metabolic pathway tracing of TCA cycle and other metabolites in cells expressing ISCU<sup>D71A</sup>. Filled circles represent carbons derived from the <sup>13</sup>C<sub>6</sub>-glucose tracer, while unfilled circles represent <sup>12</sup>C not derived from the tracer. Only isotopologues representing >10% of the total pool of a given metabolite in ISCU<sup>D71A</sup> cells are shown. (B-P) Total cellular quantities of metabolite isotopologues (n=3, mean±SD). These metabolites were measured by GC-MS, except for pyruvate, lactate and succinate, which were measured by IC-UHR-FTMS. <sup>13</sup>C enrichment of glycolysis intermediates upstream of pyruvate was essentially 100% (data not shown).

# Metabolic reprogramming in acute Fe-S cluster deficiency

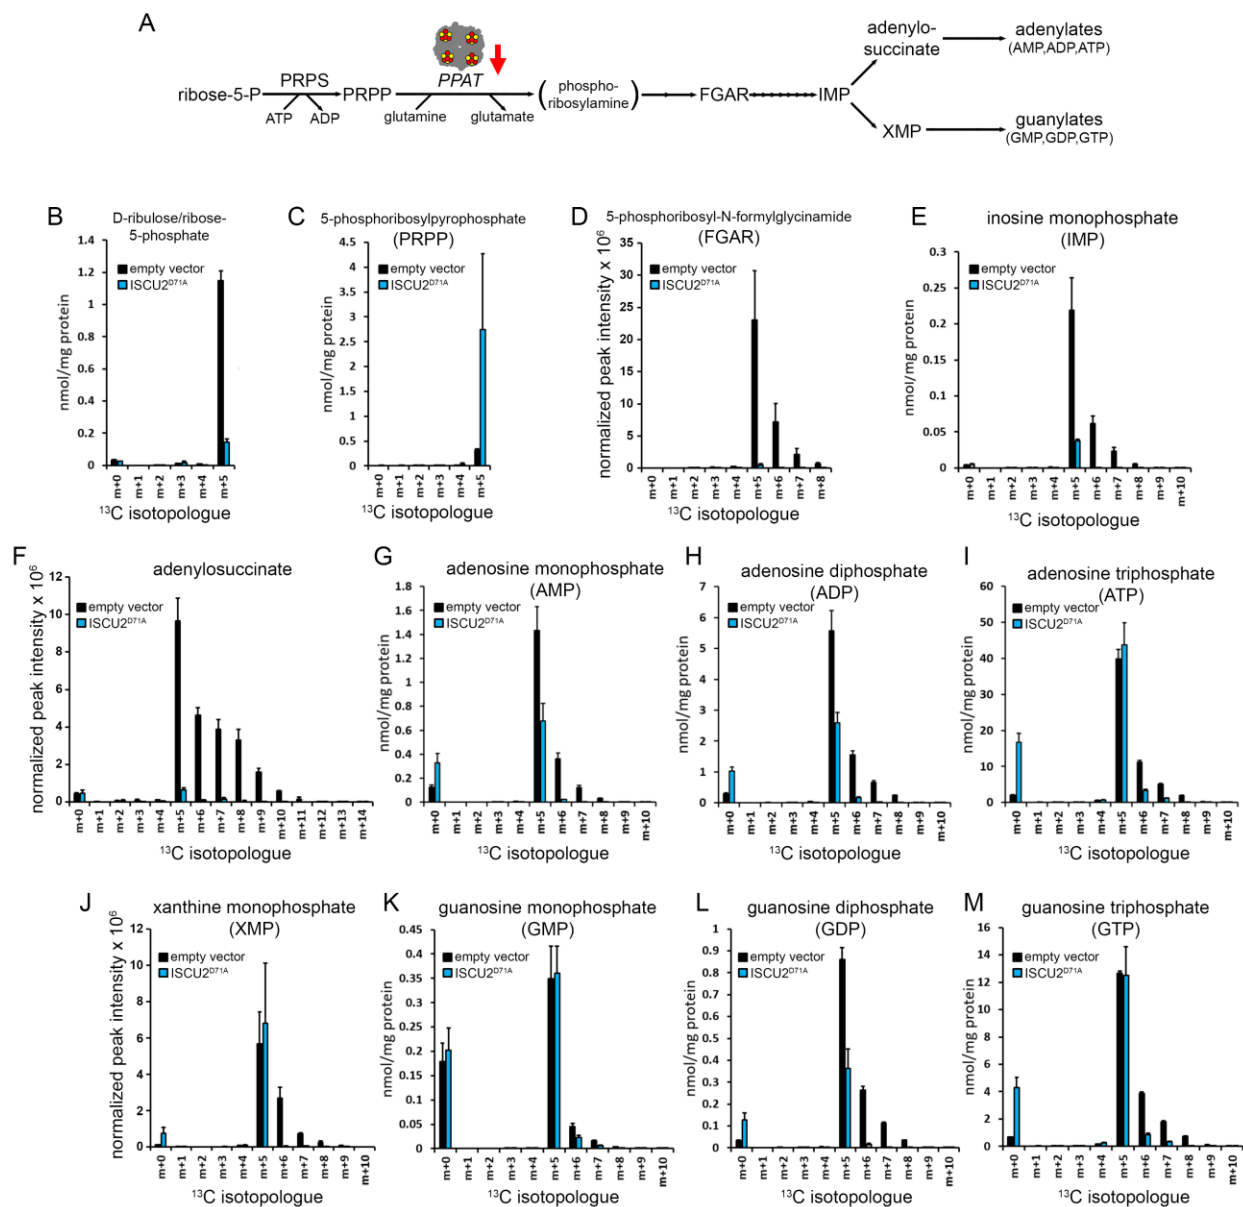

**Figure S3: Analysis of de novo purine biosynthesis.** (A) Schematic diagram outlining *de novo* purine biosynthesis in cells expressing empty vector or  $\text{ISCU}^{\text{D71A}}$ . (B-M) IC-UHR-FTMS analysis of  $^{13}\text{C}$  isotopologue distribution of selected intermediates in the purine biosynthetic pathway. With metabolites for which a standard was not available, data are expressed as normalized peak intensities.

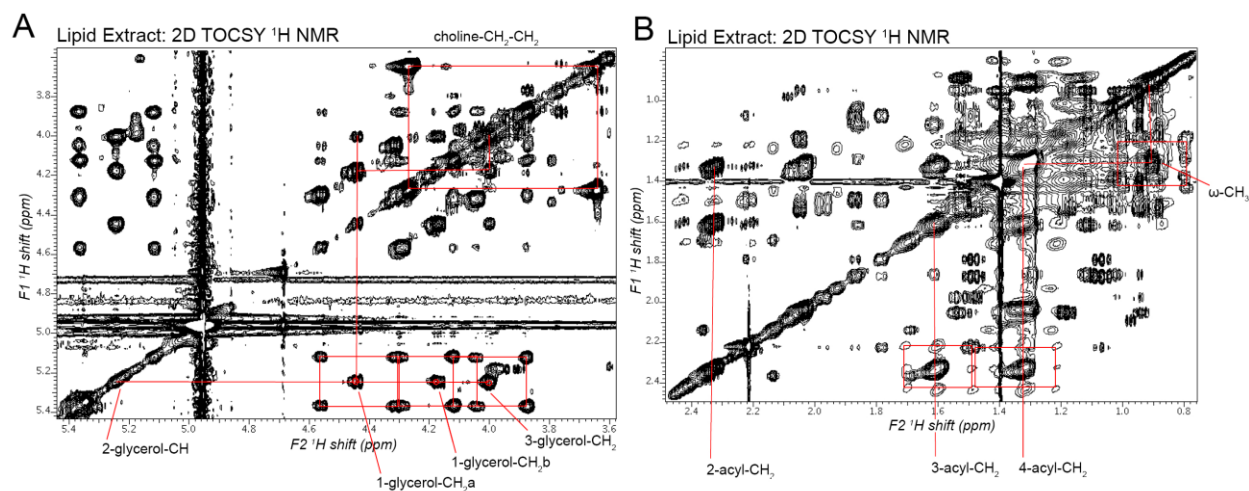

**Figure S4: 2D TOCSY NMR spectra** (A) 2D TOCSY spectrum region showing the glycerol and choline subunits of the glycerophospholipids in HEK293 lipid extracts. As expected, there was no significant  $^{13}\text{C}$ -enrichment in the choline subunits of the glycerophosphocholines, but substantial and equal  $^{13}\text{C}$  enrichment on all three carbons of the glycerol subunits, denoted by the red boxes that connect the  $^{13}\text{C}$  satellite peaks. (B) 2D TOCSY spectrum region showing the fatty acyl chains of the GPLs. The boxes connecting the peaks at 2.3 to 1.6 and 1.32 ppm are the  $^{13}\text{C}$  satellites of the C2-C3 and C2-C4 resonances of the acyl chains respectively. The specific pattern shows that the acetyl-CoA pool comprised a mixture of  $^{13}\text{C}$  2 acetyl units deriving from  $^{13}\text{C}$ -glucose and from unlabeled sources. The  $\omega$ -methyl resonances also showed  $^{13}\text{C}$  -2 acetyl units in the acyl chains, indicating that complete chain synthesis had occurred, as these are present only in the complex lipid (e.g. GPL and TAG).

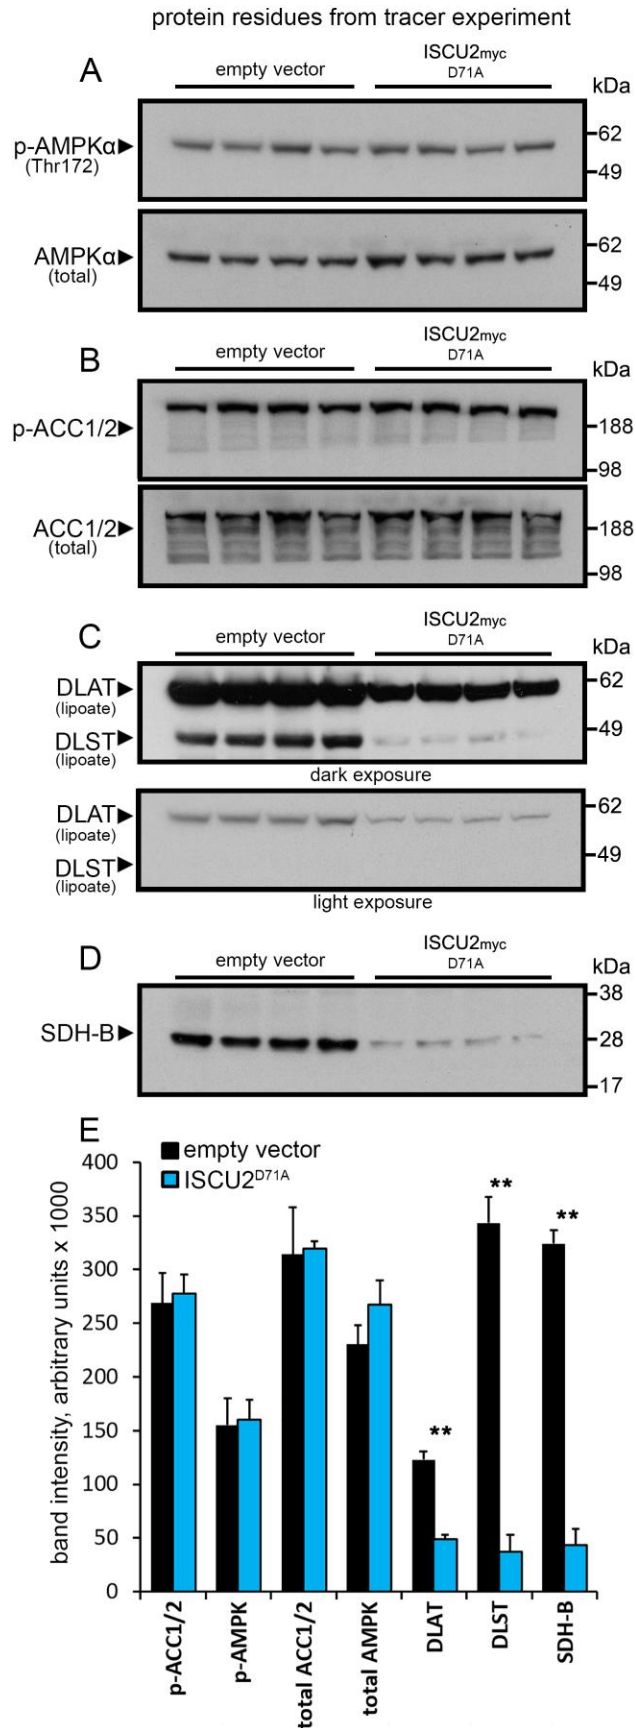

**Figure S5: Immunoblots of proteins obtained from the extracts used for metabolomics experiments.** The protein residues recovered from the Stable Isotope-Resolved Metabolomics (SIRM) tracer experiment presented in Figures 4 and 5 were subjected to SDS-PAGE and immunoblotting. These data indicated (A) no significant change in Thr172 phosphorylation of AMPK $\alpha$  or total AMPK $\alpha$  levels. (B) No significant change in phospho-ACC levels or total ACC levels. (C) A mild decrease in lipoylation of pyruvate dehydrogenase (PDH) subunit DLAT and a strong decrease in  $\alpha$ -ketoglutarate dehydrogenase subunit DLST; dark and light exposures of the same immunoblot are shown. (D) Immunoblot for Fe-S-containing subunit SDHB confirmed that this protein was greatly decreased in these samples. (E) Densitometry was applied to the western blots presented in this figure, revealing a significant decrease in DLAT, DLST, and SDH-B protein levels in cells expressing ISCU2<sup>D71A</sup> protein. (n=4, % control $\pm$ SD; \*\*p<0.01).



## Metabolic reprogramming in acute Fe-S cluster deficiency

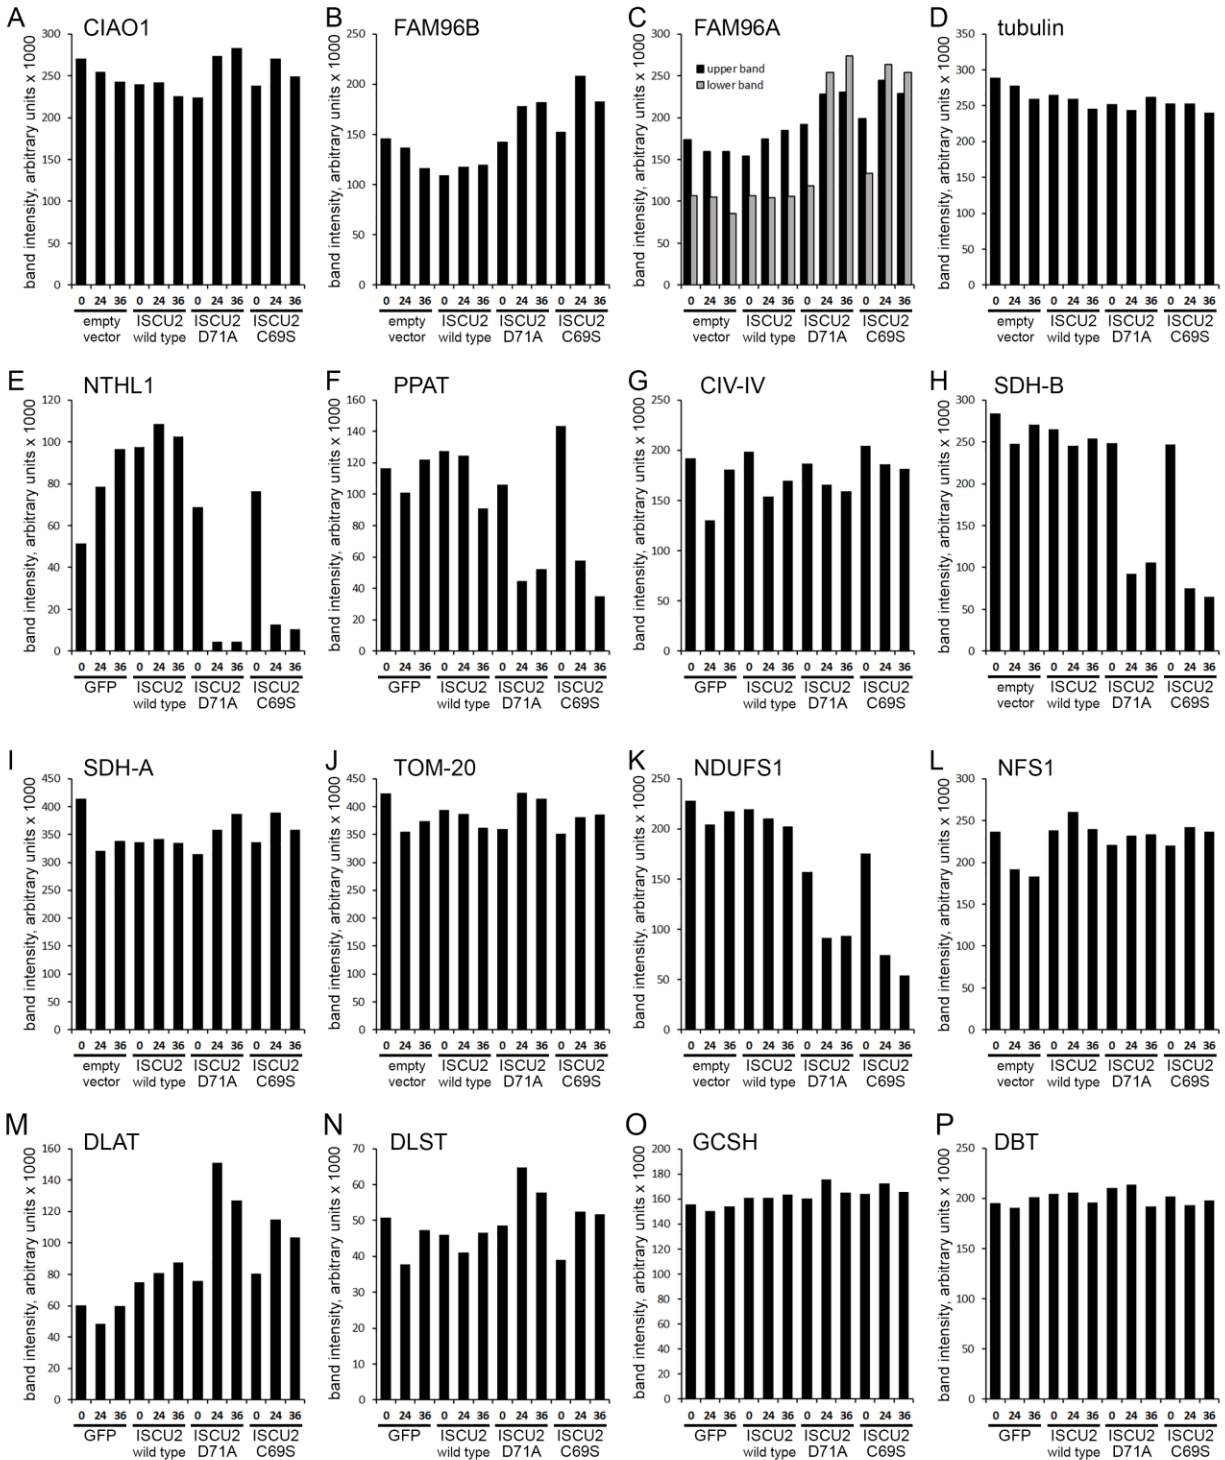

**Figure S6: Densitometry of western blots.** Bands from selected western blots were quantified and normalized to total protein on the membrane as assessed by Ponceau-S staining. (A-D) Quantified bands from Figure 2D. (E-G) Quantified bands from Figure 3A. (H-J) Quantified bands from Figure 3B. (K,L) Quantified bands from Figure 3C. (M-P) Quantified bands from Figure 3F.
